# Supplementary material
Source: HighWire-hosted journal article supplement (https://cmaj.ca/highwire/filestream/58484/field_highwire_adjunct_files/0/pg7.pdf)
Supplement: pg7.pdf [file pg7.pdf]

## PRODUCTION

Production Manager • Gestionnaire de la production  
Kathryn A. Freamo

Production Assistants • Assistantes à la production  
Nicole Barbeau, Lianne Johnsen, Carole Lalonde

## ADVERTISING • PUBLICITÉ

Manager, Journal Advertising  
Gestionnaire, Annonces publicitaires  
Beverley Kirkpatrick

Coordinator, Display Advertising  
Coordonnatrice de la publicité  
Nancy Pope

Assistant Manager, Classified Advertising  
Gestionnaire adjointe, annonces classées  
Deborah Rodd

613 731-9331, fax 613 565-7488  
advertising@cma.ca

For information on how to advertise  
in any of the CMA journals  
[www.cma.ca](http://www.cma.ca)

Pour savoir comment placer une annonce  
dans les revues publiées par l'AMC  
[www.cma.ca](http://www.cma.ca)

Marketing and Advertising Sales  
Marketing et publicité  
Keith Health Care Inc.

| Toronto          | Montréal         |
|------------------|------------------|
| 905 278-6700     | 514 624-6979     |
| 800 661-5004     | 877 761-0447     |
| fax 905 278-4850 | fax 514 624-6707 |

All prescription drug advertisements have been cleared by the Pharmaceutical Advertising Advisory Board.

Toutes les annonces de médicaments prescrits ont été approuvées par le Conseil consultatif de publicité pharmaceutique.

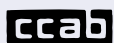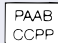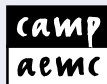

ASSOCIATION  
MÉDICALE  
CANADIENNE

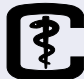

CANADIAN  
MEDICAL  
ASSOCIATION

President • Président  
Hugh Scully

Secretary General • Secrétaire général  
Peter W. Vaughan

Director, Publications  
Directeur, Publications  
R. Peter Milroy

Manager, Publishing Services  
Gestionnaire, Services de publication  
Jill Rafuse

## Publications Committee • Comité des publications

Stuart M. MacLeod (Chairman • Président)  
Henry Haddad  
Philip F. Hall  
Barbara P. Lent  
D'Arcy Lawrence Little  
Jonathan L. Meakins  
Mark Roper  
W. Grant Thompson

Permissions • Permissions  
Karen McKenzie (mckenk@cma.ca)

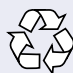

Printed on recycled paper • Imprimé sur papier recyclé

## L'irradiation des aliments : Allons-y

La lecture du rapport de 1999 du vérificateur général du Canada<sup>1</sup> nous a fait passer un après-midi agréable récemment. Même si cette affirmation confirmera probablement les soupçons de nos lecteurs qui pensent que nous passons notre temps à ne rien faire, le rapport est fascinant — et particulièrement le chapitre 15. Le chapitre décrit une épidémie d'infection à *Salmonella enteritidis*, survenue en mars et avril 1998, qui a débouché sur l'étude de plus de 800 cas, dont la plupart étaient des enfants.<sup>2</sup> Lorsqu'on a découvert la source — du fromage contaminé contenu dans des collations préemballées pour le déjeuner — il a fallu plus de quatre semaines à Santé Canada et à l'Agence canadienne d'inspection des aliments (ACIA) pour faire retirer complètement des épiceries le produit contaminé (voir la page 92 de ce numéro).

Dans son rapport, le vérificateur général attribue une grande partie du blâme, et à juste titre, aux deux organismes chargés de la salubrité des aliments au Canada. Santé Canada n'avait aucun protocole pour reconnaître une épidémie de toxi-infection alimentaire ou pour lutter contre un tel problème. L'ACIA aurait dû jouer le rôle de chef de file et coordonner l'intervention d'urgence à la suite de l'épidémie. L'organisme n'a toutefois pas partagé des renseignements importants, a mis la pédale douce pour imposer le rappel du produit contaminé et a traîné en longueur dans son inspection des usines pour déterminer la cause exacte de la contamination.

La mondialisation de l'approvisionnement en aliments est une réalité.<sup>3</sup> Même en Amérique du Nord, les aliments sont maintenant distribués sur de vastes régions géographiques. La crème glacée était autrefois produite par de petites laiteries locales, mais la production est maintenant centralisée dans quelques grandes usines. Cette centralisation a contribué à l'énorme épidémie de *Salmonella* qui a fini par toucher plus de 200 000 personnes aux États-Unis il y a quelques années.<sup>4</sup> Dans le cas de l'épidémie décrite dans le rapport du vérificateur général, l'apparition de cas à des endroits aussi éloignés l'un de l'autre que Toronto et Gander a fourni rapidement un indice important aux autorités de la santé publique : ces cas n'avaient pu être causés que par la contamination d'une denrée alimentaire distribuée à grande échelle.

Dans ses recommandations, le vérificateur général ne fait pas beaucoup plus qu'ex-

horter Santé Canada et l'ACIA à mieux faire ce que la population devrait pouvoir tenir pour acquis dès le départ : les rôles et les responsabilités devraient être clairs, les organismes devraient réagir rapidement et la collaboration entre eux devrait être exemplaire. Dans le corps du rapport, Santé Canada et l'ACIA répondent en recourant à la langue de bois administrative habituelle : Santé Canada signale que le ministère a « établi un protocole d'intervention à la suite d'épidémies de toxi-infection alimentaire » et l'ACIA a l'audace de se féliciter d'avoir « réussi à gérer 257 rappels d'aliments en 1998–1999, comparativement à 165 l'année précédente ».

S'il faut se féliciter d'avoir pu traiter davantage de rappels d'aliments, il y a de toute évidence quelqu'un qui manque le bateau. On continuera de vendre des aliments non salubres et des épidémies de toxi-infection alimentaire continueront d'éclater. La qualité de la surveillance et de l'intervention ultérieures importe peu : l'épidémie s'est alors déjà produite. Il y a une solution simple — stériliser les aliments solides au moyen de rayonnements ionisants. Cette mesure réduirait considérablement le risque d'infection par les bactéries et les parasites à la suite de la contamination d'aliments. Cette technologie sans danger a reçu récemment l'aval de l'Organisation mondiale de la santé.<sup>5</sup> Les coûts sont minimes et les avantages, importants. Au Canada, la stérilisation par les rayonnements ionisants est approuvée dans le cas de quelques aliments seulement. Le moment est venu pour Santé Canada et Agriculture et Agroalimentaire Canada de promouvoir activement une application beaucoup plus générale de cette technique approuvée et sans danger. — JAMC

## Références

1. Disponible sur le site web du vérificateur général du Canada ([www.oag-bvg.gc.ca](http://www.oag-bvg.gc.ca)).
2. *Salmonella enteritidis* outbreak due to contaminated cheese — Newfoundland. *Rel mal trans can* 1999;25(3):17-21.
3. Osterholm MT. Cyclosporiasis and raspberries: lessons for the future [éditorial]. *N Engl J Med* 1997;336(22):1597-8.
4. Hennessy TW, Hedberg CW, Slutsker L, White KE, Besser-Wick JM, Moen E, et al. A national outbreak of *Salmonella enteritidis* infections from ice cream. *N Engl J Med* 1996;334(20):1281-6.
5. High-dose irradiation: wholesomeness of food irradiated with doses above 10 kGy. Report of a Joint FAO/IAEA/WHO Study Group. Disponible à l'adresse : [www.who.int/dsa/justpub/justpub.htm#High-dose](http://www.who.int/dsa/justpub/justpub.htm#High-dose) Irradiation (consulté le 13 décembre 1999).
